## 1 **Efficient Inhibition of SARS-CoV-2 Using Chimeric Antisense Oligonucleotides through** 2 **RNase L Activation**

3  
4 Xiaoxuan Su<sup>1†</sup>, Wenxiao Ma<sup>1†</sup>, Boyang Cheng<sup>1</sup>, Qian Wang<sup>1</sup>, Zefeng Guo<sup>1</sup>, Demin Zhou<sup>1</sup>, Xinjing  
5 Tang<sup>1\*</sup>  
6

7 <sup>1</sup>State Key Laboratory of Natural and Biomimetic Drugs, the School of Pharmaceutical Sciences,  
8 Peking University, 38 Xueyuan Road, Beijing 100191, China.  
9

10 \*Corresponding author: Xinjing Tang, [xinjingt@pku.edu.cn](mailto:xinjingt@pku.edu.cn)

11 †These authors contributed equally to this work.  
12

### 13 **Abstract**

14 There is an urgent need for effective antiviral drugs to alleviate the current COVID-19 pandemic.  
15 Here, we rationally designed and developed chimeric antisense oligonucleotides to degrade  
16 envelope and spike RNAs of SARS-CoV-2. Each oligonucleotide comprises a 3' antisense  
17 sequence for target recognition and a 5' -phosphorylated 2'-5' poly(A)<sub>4</sub> for guided ribonuclease L  
18 (RNase L) activation. Since RNase L can potently cleave single strand RNA during innate antiviral  
19 response, the improved degradation efficiency of chimeric oligonucleotides was twice as much as  
20 classic antisense oligonucleotides in Vero cells, for both SARS-CoV-2 RNA targets. In  
21 pseudovirus infection models, one of chimeric oligonucleotides targeting spike RNA achieved  
22 potent and broad-spectrum inhibition of both SARS-CoV-2 and its recently reported N501Y and/or  
23 ΔH69/ΔV70 mutants. These results showed that the constructed chimeric oligonucleotides could  
24 efficiently degrade pathogenic RNA of SARS-CoV-2 facilitated by immune activation, showing  
25 promising potentials as antiviral nucleic acid drugs for COVID-19.  
26  
27

### 28 **Introduction**

29 Since the infection was first reported in 2019, severe acute respiratory syndrome coronavirus 2  
30 (SARS-CoV-2) has continued to spread globally and caused the pandemic COVID-19 disease (1).  
31 The current lack of highly effective antiviral drugs for SARS-CoV-2 has made the treatment of  
32 infected patients more difficult, thus demanding more candidate options for drug discovery.

33 Genomic positive-sense single-stranded RNA (ssRNA) and structural proteins participate in virus  
34 packaging, which is an essential step in SARS-CoV-2 life cycle. Envelope (E), spike (S) and  
35 membrane (M) proteins assemble the virus membrane in host cells infected by SARS-CoV-2 (2,  
36 3), and thus become ideal drug targets to intervene virus proliferation.

37 RNase L participates in innate antiviral response of vertebrate cells by cleaving UN<sup>N</sup> sites located  
38 in viral or cellular ssRNAs. Cytoplasmic RNase L monomer only displays weak catalytic cleavage  
39 on the substrate. However, upon dimerization induced by its specific ligand 5' phosphorylated 2'-  
40 5' polyA (such as 4A<sub>2-5</sub>), RNase L is highly activated and performs intense RNA cleavage (4). The  
41 cleavage products can further bind to intracellular pattern recognition receptors (PRRs) to stimulate  
42 the production of interferons (IFN) (5-7), which in turn induces the expression of interferon  
43 stimulated genes (ISGs) including RNase L, to enhance the antiviral response (2, 7, 8). Ubiquitous  
44 activation of RNase L might cause widespread attenuation of basal mRNA and possible cell  
45 apoptosis, especially at high doses of 4A<sub>2-5</sub> (9-12). Guided and controlled activation of RNase L  
46 could otherwise achieve more specific target RNA degradation. RNA binding small molecules  
47 conjugated with 4A<sub>2-5</sub> have been reported to target highly-structured microRNA or RNA fragments  
48 of virus genome (13, 14), which contains particularly structured sequences. Nevertheless, the  
49 selective binding between a small molecule and the specific region of pathogenic RNA is limited,  
50 while the sequence-selective antisense oligonucleotides (ASO) will be more accessible and  
51 effective to target viral RNA of interest.

52 ASO therapy has successfully targeted undruggable pathogenic genes of rare diseases and has been  
53 developed against the infection of ssRNA viruses such as SARS-CoV (15) in a sequence-specific  
54 manner. Chemical modifications on ASOs can further promote their nuclease resistance and/or  
55 binding affinity to target RNA sequences, such as phosphorothioate (PS) linkages and 2'-O-methyl  
56 (2'-OMe) substituents (16). Currently a few reports have raised the possibility of combining ASOs  
57 with 4A<sub>2-5</sub> for the treatment of tumors (17) and viral infections (12, 18). Therefore, it is promising  
58 to develop nucleic acid drugs in form of ASO-4A<sub>2-5</sub> chimera targeting SARS-CoV-2 genomic  
59 RNAs to inhibit virus infection.

60 Here, based on nucleic acid-hydrolysis targeting chimeras strategy, we developed chimeric  
61 antisense oligonucleotides with 4A<sub>2-5</sub> conjugation through flexible PEG linker to target envelope  
62 RNA (Chimera-E) or spike RNA (Chimera-S) of SARS-CoV-2. The antisense component

63 specifically recognizes complementary target RNA sequence, while the covalently linked 4A<sub>2-5</sub>  
64 moiety functions as RNase L recruiter, thus collectively guiding RNase L to specific cleavage sites  
65 on targeted viral RNA. With these ASO-4A<sub>2-5</sub> chimeras, we evaluated RNA knockdown of both  
66 SARS-CoV-2 envelope and spike genes in Vero cells. Further in a pseudotyped SARS-CoV-2  
67 infection model, ASO-4A<sub>2-5</sub> chimeras for spike gene successfully inhibited pseudovirus packaging  
68 and further infection on host cells. One of these chimeras targeting spike gene also effectively  
69 inhibited three mutants of SARS-CoV-2 pseudovirus, including N501Y, ΔH69/ΔV70, and the  
70 recently discovered dual-site mutations with higher spreading ability. In addition, these chimeras  
71 could upregulate the expression of RNase L and cytokines (such as IFN-β and IL-6) as antiviral  
72 immune responses *in vitro*. The antiviral efficacy and versatility of the 4A<sub>2-5</sub>-modified chimeric  
73 oligonucleotides provide a new treatment option for the current COVID-19 pandemic.

74

## 75 **Results**

76

### 77 **Rational design and characterization of RNase L-recruiting chimeric antisense** 78 **oligonucleotides**

79 Our study began with the selection of antisense oligonucleotides targeting specific genomic RNA  
80 of SARS-CoV-2. After predicting RNA secondary structures of spike receptor binding domain (S-  
81 RBD) and envelope (E) protein of SARS-CoV-2, loops composed of more than 10 nucleotides  
82 were selected as ideal target regions. In addition, considering the space required for RNase L  
83 activation and substrate cleavage, the stem structure in 3' proximity of the selected loop was limited  
84 to have less than 4 base pairs, and its 3' pairing end should have more than 1 RNase L cleavage  
85 site (UN<sup>N</sup>) in a bulge structure. As a result, antisense sequences complementary to the selected  
86 loops were predicted with more than 70% probability of being efficient antisense strands as  
87 evaluated by OligoWalk (19) and was synthesized through solid phase synthesis (**Table S1**). To  
88 enhance nuclease resistance and binding affinity with their complementary viral RNA regions,  
89 phosphorothioate (PS) linkages and 2'-O-methyl (2'-OMe) substituents were properly incorporated  
90 into the chimeric structure, followed by the coupling of a poly 2'-5' poly(A)<sub>4</sub> ligand at 5' terminus  
91 of the designed antisense sequence (15 nt) through a short PEG linker (**Fig. 1B**).

92 We first tested RNase L recruitment ability of Chimera-E-PO, an oligonucleotide modified with 5'  
93 native 4A<sub>2-5</sub> ligand and complementary to a loop structure on Cy3-labeled partial E-RNA sequence  
94 of SARS-CoV-2 (**Table S1**). As shown in **Fig 1C**, after incubating RNase L with Chimera-E-PO  
95 or 4A<sub>2-5</sub>, *in vitro* cleavage of Cy3-labeled substrate RNA was analyzed in a denaturing PAGE gel.  
96 Treatment of RNase L alone did not lead to the cleavage of substrate RNA, while additional  
97 Chimera-E-PO treatment activated RNase L and produced cleavage bands in a manner different  
98 from that of 4A<sub>2-5</sub> treated group. The cleavage preferences of Chimera-E-PO for these specific  
99 cleavage sites indicated its specific binding for RNA substrate.

## 100 **Evaluation of ASO-4A<sub>2-5</sub> chimera for viral RNA knockdown and pseudovirus inhibition of** 101 **SARS-CoV-2**

102 We first selected envelope gene featured with a relative short viral RNA sequence, and evaluated  
103 E-RNA degradation efficiency using Chimera-E in Vero cells after co-transfection of pCAG-  
104 nCoV-E-FLAG plasmids. As we expected, treatment of 20 nM ASO-E alone could only partially  
105 downregulate E-RNA level to 83% in comparison to the negative control, while treatment of 20  
106 nM Chimera-E downregulated E-RNA level to 35%, 2-fold more efficiently than that of ASO-E as  
107 measured by RT-qPCR (**Fig. 2A**). In addition, RNase L transcription level was also significantly  
108 increased with higher concentration of Chimera-E (**Fig. 2B**) which may further enhance the RNase  
109 L induced sequence-specific degradation of E-RNA. This result showed that Chimera-E could  
110 potently decreased intracellular E-RNA levels facilitated by RNase L activation, which inspired us  
111 to develop 4A<sub>2-5</sub>-ASO chimeras for spike protein, a more promising target to inhibit SARS-CoV-  
112 2 infection.

113 The on-target effects of three previously designed chimeric oligonucleotides (**Table S1**) against  
114 the spike RNA (S-RNA) of SARS-CoV-2 were evaluated in Vero cells using RT-qPCR (**Fig. 3A**).  
115 After co-transfection of pCAG-nCoV-S-FLAG plasmids and 80 nM oligonucleotides for 24 hours,  
116 all chimeras (Chimera-S) and antisense oligonucleotides (ASO-S) decreased S-RNA down to less  
117 than 50% level of negative control. Comparing ASO-S and Chimera-S containing the same  
118 antisense oligonucleotide sequence, more than 2-fold enhancement of S-RNA degradation was  
119 observed for Chimera-S that was able to activate endogenous RNase L by 4A<sub>2-5</sub> moiety. Among  
120 three chimeric antisense oligonucleotides, Chimera-S4 displayed the highest enhancement in S-  
121 RNA degradation compared with its control group (ASO-S4). In addition, RNase L transcription  
122 levels in Vero cells upon the treatment of Chimera-S4, Chimera-S5 and Chimera-S6 were 2- ~ 4-

123 fold higher than that of corresponding negative control, while all three antisense oligonucleotides  
124 without the conjugation of 4A<sub>2-5</sub> had no obvious effects on RNase L transcription (**Fig. 3B**). These  
125 results reconfirmed that chimeric ASO conjugated with 4A<sub>2-5</sub> efficiently activated cellular RNase  
126 L which further enhanced the degradation of target viral RNA.

127 To further compare their efficiencies of S-RNA degradation and viral packaging inhibition, all  
128 above three chimeric oligonucleotides (Chimera-S4, Chimera-S5 and Chimera-S6) were applied to  
129 HEK293T packaging cells in a pseudotyped SARS-CoV-2 infection model (**Fig. 3C**). Since  
130 chimeric oligonucleotides led to the degradation of S-RNA, decrease of S protein expression and  
131 pseudovirus production could be observed. For titration of pseudovirus, two reporter genes, GFP  
132 and firefly luciferase were carried by pseudovirus. A hACE2 expressed cell line HEK293T-hACE2  
133 was also established for pseudovirus titration. To examine effects of chimeric oligonucleotides on  
134 the transfection efficiency in pseudotyped SARS-CoV-2 infection model, GFP level in HEK293T  
135 packaging cell was compared. As expected, all groups showed similar GFP level (**Fig. S1**),  
136 indicating similar transfection efficiency in HEK293T packaging cells. In the infection model,  
137 Chimera-S4 was more potent to reduce titer of pseudovirus. At 40 nM and 80 nM, Chimera-S4  
138 treatment reduced luminescence to 24% and 6% respectively, comparing to the corresponding  
139 control group, while firefly luminescence was down to 45% and 14% for Chimera-S5, 50% and  
140 28% for Chimera-S6 at the same concentrations (**Fig. 3D**). Meanwhile, scrambled oligonucleotide  
141 showed no inhibition of pseudovirus, confirming the on-target effect of Chimera-S. GFP level of  
142 HEK293T-hACE2 was also monitored and Chimera-S4 also showed the most promising inhibition  
143 efficiency (**Fig. 3E**), which was consistent with luciferase assay. These results clearly showed that  
144 Chimera-S4 was the most effective and promising antiviral candidate among above Chimera-S  
145 oligonucleotides and could be used for further assessment.

#### 146 **Chimera-S4 as a potent inhibitor of SARS-CoV-2 pseudovirus packaging**

147 We further investigated the concentration dependence of Chimera S4 for S-RNA degradation. RT-  
148 qPCR results showed that 20 nM Chimera-S4 induced a reduction of S-RNA up to 80%. Increasing  
149 its concentration to 80 nM only led to slight enhancement of S-RNA reduction, but would cause  
150 an approximately 2-fold up-regulation of RNase L expression (**Fig. 4A, 4B**). Surprisingly, the titers  
151 of SARS-CoV-2 pseudovirus dropped sharply from 60% to 6% when the concentration of  
152 Chimera-S4 increased from 20 to 80 nM (**Fig. 4C**). In comparison to the individual ASO-S4 and  
153 4A<sub>2-5</sub>, Chimera-S4 degraded S-RNA in Vero cells with up to 4.5- and 2.1-fold higher efficiency at

154 40 nM concentration (**Fig. 4A**). In addition, 2.9- and 1.4-fold higher upregulation of RNase L were  
155 also observed upon 80 nM Chimera S4 treatment (**Fig. 4B**). Compared with physically mixed 4A<sub>2-5</sub>  
156 and ASO-S4 (4A<sub>2-5</sub> + ASO-S4), Chimera-S4 led to similar reduction of S-RNA in Vero cells at  
157 20 nM ~ 80 nM concentrations. However, the result of luciferase assays showed that Chimera-S4  
158 displayed 3.8- and 19.2-fold higher inhibitory effects on viral titers at 40 nM and 80 nM than those  
159 of 4A<sub>2-5</sub> + ASO-S4 group in HEK293T cells (**Fig. 4C**). To reconfirm the efficiency of Chimera-  
160 S4, GFP expression in infected HEK293T-hACE2 cells was also analyzed by flow cytometry. The  
161 positive rate of GFP fluorescent cells treated with 40 nM Chimera-S4 was 29.07%, much lower  
162 than those of negative control (81.46%), 4A<sub>2-5</sub> (71.35%), ASO-S4 (69.06%) and 4A<sub>2-5</sub>+ASO-S4  
163 (65.70%) groups under the same assay conditions (**Fig. 4D**), and could be further enhanced at  
164 higher concentrations of Chimera-S4 (**Fig. S2**). Fluorescent images of infected HEK293T-hACE2  
165 cells were consistent with the results presented by flow cytometry (**Fig. 4E, Fig. S2**). Similarly,  
166 GFP fluorescence in HEK293T packaging cells confirmed the consistency of transfection  
167 efficiency across different groups (**Fig. S2**). All these results clearly showed that Chimera-S4 could  
168 efficiently reduce S-RNA level in a RNase L-facilitated manner and effectively inhibit SARS-  
169 CoV-2 pseudovirus at moderate doses, without serious damage to cell status or viability (**Fig. S2,**  
170 **Fig. S3**).

171 As mentioned in the above results, Chimera-S4 obviously induced the up-regulation of RNase L,  
172 which also participated in antiviral immunity and activated the expression of other antiviral  
173 proteins, such as IFN- $\beta$  and IL-6. Thus, we also assayed these intracellular mRNA levels of IFN- $\beta$   
174 and IL-6 after the activation of RNase L induced by Chimera-S4 (**Fig. S3**). When A549 cells were  
175 transfected with Chimera-S4 at different concentrations from 40 nM to 80 nM, the relative mRNA  
176 levels of IFN- $\beta$  and IL-6 simultaneously increased from 5.9- to 26-fold and 2.0- to 7.5-fold in a  
177 concentration-dependent manner, respectively. In addition, Chimera-S4 induced much higher  
178 levels of antiviral proteins than those of individual 4A<sub>2-5</sub>, ASO-S4 and 4A<sub>2-5</sub> + ASO-S4 mixture,  
179 indicating its higher potential to simultaneously activate antiviral immune response in SARS-CoV-  
180 2 therapy.

### 181 **Inhibition of SARS-CoV-2 pseudovirus mutants by Chimera-S4**

182 Mutation  $\Delta$ H69/ $\Delta$ V70 and N501Y on spike protein of SARS-CoV-2 have been reported to cause  
183 S-gene target failure (SGTF) and greatly increase viral transmissibility (20, 21). To assess the  
184 broad-spectrum inhibition on SARS-CoV-2 mutants, Chimera-S4 was then co-transfected with



185 pseudovirus packaging plasmids carrying  $\Delta$ H69/ $\Delta$ V70, N501Y or dual-site mutations into  
186 HEK293T packaging cells for further viral inhibition assay. Transfection efficiencies in HEK293T  
187 cells across different groups were consistent (**Fig. S4**). luciferase assay showed that titer of all three  
188 mutants were reduced to less than 20% after 48 hours treatment of 40 nM Chimera-S4 (**Fig. 5A**),  
189 which indicated a more robust inhibition of viral infection than those of 4A<sub>2-5</sub>, ASO-S4, 4A<sub>2-5</sub> +  
190 ASO-S4 and scrambled sequences. GFP fluorescence analysis in infected HEK293T-hACE2 cells  
191 also displayed the same inhibiting manner as the firefly luciferase assay (**Fig. 5B**). These results  
192 indicated that Chimera-S4 could generally and efficiently inhibit the packaging and infection of  
193  $\Delta$ H69/ $\Delta$ V70 and/or N501Y mutated SARS-CoV-2 pseudovirus *in vitro*.

194

## 195 **Discussion**

196 We demonstrated that 4A<sub>2-5</sub>-chimeric antisense oligonucleotides (4A<sub>2-5</sub>-ASO) displayed potent  
197 antiviral effects against SARS-CoV-2 and its mutants by degrading target viral RNA of structural  
198 proteins through recruiting endogenous RNase L. *In vitro* cleavage assay validated that chimeric  
199 oligonucleotides could activate RNase L to cleave target RNA in a manner different from 4A<sub>2-5</sub>  
200 induced substrate RNA cleavage, indicating its sequence-specific targeting process. Co-  
201 transfection of Chimera-E or Chimera-S with plasmids for E-RNA or S-RNA in Vero cells  
202 achieved up to 65% and 80% downregulation of RNA targets at 20 nM, which is much more  
203 efficient than that of corresponding classic ASOs, and much more unlikely to cause ubiquitous  
204 basal RNA decay due to 4A<sub>2-5</sub> induced RNase L activation. Instead of IFN-deficient Vero cells,  
205 human alveolar basal epithelial cells A549 have been used to evaluate upregulation of IFN- $\beta$  and  
206 IL-6 in a reprogrammed antiviral state upon RNase L activation (9). Upon treatment of Chimera-  
207 S4, the upregulation of antiviral gene transcription like IFN- $\beta$  and IL-6 in A549 cells was observed,  
208 which is consistent with the intense activation of RNase L triggered by Chimera-S4. Due to the  
209 positive feedback of IFN- $\beta$  on RNase L activation (11) and host defense against virus infection,  
210 4A<sub>2-5</sub>-ASO chimera shows a strong inhibitory effect on virus proliferation at relatively low  
211 concentrations. Moreover, the mutation sites of spike genes corresponding to N501Y and  
212  $\Delta$ H69/ $\Delta$ V70 are not overlaid with the target sequence of S-RBD RNA and can be still recognized  
213 by Chimera-S4, thus barely influencing its targeting process required for efficient S-RNA  
214 degradation. Therefore, in infection models of all three SARS-CoV-2 pseudovirus mutants, strong  
215 inhibition of SARS-CoV-2 packaging and infection was still successfully achieved.

216 Due to the acute shortage of biosafety level 4 conditions in the global COVID-19 pandemic, we  
217 currently have no chance to further evaluate the inhibitory effect of our chimeric 4A<sub>2-5</sub>-ASO on  
218 natural SARS-CoV-2 infection. However, we did confirm that chimeric oligonucleotides could  
219 efficiently inhibit viral proliferation in the SARS-CoV-2 pseudovirus infection model. And these  
220 exogenous ASO could be effectively delivered into lung tissues according to previously reported  
221 delivery strategies (22, 23), which would further expand their potential applications *in vivo*.  
222 Furthermore, interferons themselves are also therapeutic agents used for virus immunotherapy (24,  
223 25) if severe release of proinflammatory cytokines is well controlled.(26).

224 In conclusion, we developed a group of 4A<sub>2-5</sub> chimeric oligonucleotides based on nucleic acid-  
225 hydrolysis targeting chimera strategy (NATAC) and successfully down-regulated target SARS-  
226 CoV-2 RNAs. Among them, Chimera-S4 showed the most potent degradation of S-RBD RNA and  
227 the inhibition of SARS-CoV-2 pseudovirus. Compared with classic ASO silencing strategy,  
228 Chimera-S4 also activated RNase L, which significantly improved RNA degradation efficiency,  
229 and induced additional antiviral immune response upon its recruitment by 4A<sub>2-5</sub> ligand. This  
230 chimeric sequence still showed robust inhibiting capability toward three highly transmissible  
231 SARS-CoV-2 mutants involving N501Y and ΔH69/ΔV70 mutations. Antisense oligonucleotides  
232 have the characteristics of sequence-specific targeting, convenient design and synthesis, which  
233 make this 4A<sub>2-5</sub>-ASO chimera suitable for further development of nucleic acid drugs combating  
234 foreseeable evolving COVID-19 pandemics.

235

## 236 **Materials and Methods**

237

### 238 **Experimental Design**

239 We developed chimeric antisense oligonucleotides with enhanced degradation of target viral RNA  
240 and potent antiviral efficiency against SARS-CoV-2 facilitated by RNase L. Sequences of  
241 oligonucleotides, protein of purified GST-RNase L, plasmids and cell lines required by  
242 pseudotyped SARS-CoV-2 infection model were prepared first. Then *in vitro* RNase L cleavage  
243 assay and primary RT-qPCR assay in Vero cells were carried out to validate the RNase L recruiting  
244 mechanism of the chimeric design. Next, we screened three chimera candidates targeting S-RBD  
245 gene of SARS-CoV-2 for the most efficient one through evaluating their downregulation of S-RNA  
246 by RT-qPCR in Vero cells and the inhibition of SARS-CoV-2 pseudovirus packaging in HEK293T  
247 cells. Mutants of SARS-CoV-2 pseudovirus involving N501Y and/or ΔH69/ΔV70 mutations were  
248 also included. Further concentration dependence, regulation of IFN-β and IL-6 as well as influence



249 on cell viability of the most efficient oligonucleotide candidate were investigated in Vero cells or  
250 A549 cells.

### 251 **Design of oligonucleotide sequences**

252 Secondary structures of SARS-CoV-2-E RNA and SARS-CoV-2-S-RBD RNA were predicted by  
253 RNAfold web server (Institute for Theoretical Chemistry, University of Vienna) based on  
254 minimum free energy (MFE) and partition function algorithms. Antisense oligonucleotide  
255 candidates targeting specific SARS-CoV-2 RNA fragments were given by Oligowalk (Mathews  
256 group, University of Rochester Medical Center) for the further selection of antisense  
257 oligonucleotides.

### 258 **Preparation of oligonucleotides**

259 Chimeric oligonucleotides (Chimera-E or Chimera-S), ASO-S control oligonucleotides and 3'-Cy3  
260 labeled E-RNA segment were purchased from Biosyntech. Chi-E-PO, ASO-E and 4A<sub>2-5</sub> control  
261 oligonucleotide were synthesized on ABI DNA/RNA synthesizer based on standard  
262 phosphoramidite chemistry, and were purified through HPLC (Waters, Alliance e2695) after the  
263 cleavage and deprotection. All the oligonucleotides were confirmed by ESI-MS (Sangon Biotech).  
264 Each oligonucleotide was dissolved in nuclease-free water and quantified with NanoDrop 2000  
265 (Thermo Fisher Scientific) at 260 nm before use.

### 266 **Preparation of plasmids**

267 The pCAG-FLAG vectors containing SARS-CoV-2-E gene (pCAG-nCoV-E-FLAG) or SARS-  
268 CoV-2-S gene (pCAG-nCoV-S-FLAG) were generously provided by Prof. Wang Pei-Hui's lab  
269 (Shandong University). Full length RNase L gene was synthesized and subcloned into pGEX-4T-  
270 3 vector (pGEX-4T-RNaseL-GST) by GENEWIZ as previously described (27).

271 Plasmid pcDNA 3.1-SARS-CoV-2-Spike, pLVX-hACE2-IRES-puro, pMD2G-VSVG, pspAX.2,  
272 pLenti-FLuc-GFP were constructed to generate SARS-CoV-2 pseudovirus and establish transgeni  
273 c cell line HEK293T-hACE2. Briefly, gene segment containing spike protein of SARS-CoV-2 wa  
274 s synthesized by GenScript Inc. without codon optimization and was inserted into pcDNA 3.1 to g  
275 et pcDNA 3.1-SARS-CoV-2-Spike using NEBuilder<sup>®</sup> HiFi DNA Assembly Master Mix (NEB) a  
276 ccording to the manufacturer's instructions. In order to construct transfer plasmid pLVX-hACE2-

277 IRES-puro, plasmid containing complete ORF of hACE29 (pMD18-T-hACE2) was purchased from  
278 Sino biological Inc. and hACE2 gene was sequenced by BGI Inc. Then hACE2 segment was amplified  
279 by primer F 5'-ATGTCAAGCTCTTCCTGG-3' and primer R 5'-CTAAAAGGAGGTC  
280 TGAACATC-3', then restriction enzyme cutting site XhoI and XbaI was added using primer forward:  
281 5'-CTCGAGCTCGAGGCCGCCACCATGTCAAGCTCTTCCTGGC-3' and reverse: 5'-TC  
282 TAGATCTAGACTAAAAGGAGGTCTGAACATCA-3'. Lentiviral transfer plasmid pLVX-IRES-  
283 S-puro was stored in our lab. Insertion of hACE2 into pLVX-IRES-puro was conducted by double  
284 digestion of XhoI and XbaI (Fermantas) and ligation of T4 ligase (NEB) according to manufacturer's  
285 instructions. Plasmid pMD2G-VSVG, pspAX.2, pLenti-FLuc-GFP was stored in our lab (2  
286 8).

287 Mutant plasmids pCMV-hnCoV-S-H501Y (forward: 5'-CCAGCCTACATATGGCGTGGGCT-3',  
288 reverse: 5'-AAGCCGTAAGACTGGAGTG-3') and pCMV-hnCoV-S- $\Delta$ 69/70 (forward: 5'-  
289 TCCGGCACAAACGGCACA-3', reverse: 5'-GATGGCGTGGAACCATGTC-3') were obtained  
290 from the wild type plasmids pCMV-hnCoV-S via Q5 SiteDirected Mutagenesis Kit (NEB). pCMV-  
291 hnCoV-S-H501Y- $\Delta$ 69/70 was obtained from pCMV-7.1-hnCoV-S-H501Y (forward: 5'-  
292 TCCGGCACAAACGGCACA-3', reverse: 5'-GATGGCGTGGAACCATGTC-3') via Q5  
293 SiteDirected Mutagenesis Kit (NEB). All plasmids were confirmed by gene sequencing (BGI  
294 Beijing). All plasmids used for transfection were amplified using a Maxiprep kit (Promega),  
295 according to the manufacturer's instructions.

## 296 **Preparation of RNase L-GST protein**

297 The RNase L-GST fusion protein was expressed in *Escherichia coli* strain DH5 $\alpha$  transformed with  
298 pGEX-4T-RNaseL-GST plasmid as previously described (27). Briefly, cells were grown at 30 °C  
299 to A<sub>595</sub> = 0.5, then 0.1 mM isopropylthio-galactoside was added and cells were grown for another  
300 3 h at 30 °C before harvest. After centrifugation at 4000 rpm at 4 °C for 15 min, cells were washed  
301 with 0.8% NaCl and resuspended in 50 mL buffer A (10 mM NaH<sub>2</sub>PO<sub>4</sub>, pH7.4, 600 mM NaCl, 10%  
302 glycerol, 1 mM EDTA, 0.1 mM ATP, 5 mM MgCl<sub>2</sub>, 14 mM 2-mercaptoethanol, 1  $\mu$ g/mL leupeptin)  
303 supplemented with 1% Triton X-100, 1 mM PMSF, 1  $\mu$ g/mL lysozyme and 10 mM DTT. Then  
304 cells were sonicated on ice and cell lysates were centrifugated at 11, 000 rpm at 4 °C for 40 min to  
305 collect supernatants. RNase L-GST protein in supernatants was purified via GST affinity  
306 chromatography (HP, Cytiva) with buffer B (20 mM glutathione, 300 mM NaCl, 50 mM Tris-HCl,

307 pH 8.0, 1 µg/mL leupeptin) as eluent. Fractions containing RNase L-GST protein were collected  
308 and the purity of the protein were analyzed by SDS-polyacrylamide gel electrophoresis.

### 309 ***In vitro* Cleavage of E-mRNA by RNase L**

310 Conditions for RNase L cleavage of single strand RNA were formerly reported (13). Briefly, Cy3-  
311 labeled E-RNA fragment as the substrate RNA was folded in 1× RNase L NM Buffer (25 mM Tris-  
312 HCl, pH7.4, 100 mM KCl) at 8 µM by heating the solution at 95 °C for 30 s and slowly cooling to  
313 25 °C. Then the above solution was supplemented with 2× Supplementary Buffer (25 mM Tris-  
314 HCl, pH7.4, 100 mM KCl, 20 mM MgCl<sub>2</sub>, 14 mM β-mercaptoethanol, 100 µM ATP) and aliquots  
315 of 4A<sub>2-5</sub> or Chi-E-PO was then added, followed by incubation at 25 °C for 30 min. Both 4A<sub>2-5</sub> and  
316 Chimera-O-E were diluted in 1× RNase L M Buffer (25 mM Tris-HCl, pH 7.4, 100 mM KCl, 10  
317 mM MgCl<sub>2</sub>, 7 mM β-mercaptoethanol, 50 µM ATP). Then RNase L was added at an equimolar  
318 concentration of 4A<sub>2-5</sub> or Chimera-O-E. Each sample was supplement to a final volume of 8 µL  
319 and was further incubated at 25 °C for 60 min. After quenching RNase L cleavage by adding 2×  
320 Loading Buffer (8 M urea, 2 mM Tris-base, 20 mM EDTA, 0.01% bromophenol blue and 0.01%  
321 xylene cyanol), samples were heated at 95 °C for 3 min and loaded in a denaturing 12.5%  
322 polyacrylamide gel. The gel was run at 250 V for 20 min and imaged using Chemiluminescence  
323 gel imaging system (ChemiDoc XRS).

### 324 **Cell culture and Transfection Procedure**

325 Vero cells and A549 cells were grown at 37 °C, 5% CO<sub>2</sub> in DMEM (M&C) supplemented with 10%  
326 fetal bovine serum (PAN), 100 units/mL penicillin, and 100 µg/mL streptomycin. Cells were  
327 seeded and incubated for 24 h. Transfection of oligonucleotides and/or plasmids were performed  
328 using Lipofectamine™ 2000 (Invitrogen) according to the manufacturer's instructions. After 6 h  
329 incubation, cells were replaced with fresh medium and incubated at 37°C, 5% CO<sub>2</sub> in for another  
330 18 h.

331 HEK293T cells and transgenic cell line HEK293T-hACE2 were maintained in DMEM (Gibco)  
332 supplemented with 10% fetal bovine serum (Gibco), 100 units/mL penicillin, and 100 µg/mL  
333 streptomycin. HEK293T cells were stored in our lab (29). Transfection of oligonucleotides and  
334 plasmids in pseudovirus infection models were performed using Lipofectamine™ 3000 (Invitrogen)

335 according to the manufacturer's instructions. After 6 h incubation, cells were replaced with fresh  
336 medium and incubated at 37°C, 5% CO<sub>2</sub> in for another 42 h.

### 337 **Real-time Polymerase Chain Reaction**

338 Vero cells or A549 cells were seeded into 24-well plates with the density of  $7.5 \times 10^4$  cells per well  
339 (for A549 cells, the density is  $1 \times 10^5$  cells per well). Oligonucleotides and/or plasmids (250 ng per  
340 well) were transfected to each well according to the group setting. After 24 h incubation at 37 °C,  
341 total RNA was extracted using BioZol reagent (Bioer) according to the manufacturer's instructions.  
342 cDNAs were synthesized with HiScript III 1<sup>st</sup> cDNA Synthesis Kit (+gDNA wiper) (Vazyme  
343 Biotech). Real time-polymerase chain reactions were performed with GoTaq qPCR Master Mix  
344 (Promega) according to the manufacturer's instructions and completed on QuantStudio 6 Flex  
345 system (ABI). RNA expression levels were determined through the  $\Delta\Delta C_t$  method and normalized  
346 with GAPDH or 18S as a housekeeping gene.

### 347 **SRB Assay**

348 Oligonucleotides and plasmids were transfected into Vero cells (seeded in 96-well plates with the  
349 density of  $2 \times 10^4$  cells per well). Cells were replaced with fresh medium after 6 h incubation. After  
350 another 18 h, culture medium was removed and cold 10% TCA was added (100  $\mu$ L per well). The  
351 plate was incubated at 4 °C for 1 h and then washed with deionized water (200  $\mu$ L per well) for  
352 four times. After naturally drying, 4 mg/mL Sulforhadamine B (SRB) dissolved in 1% aqueous  
353 acetic acid was added (100  $\mu$ L per well) and the plate was incubated at room temperature for 30  
354 min. Each well was rinsed with 1% acetic acid for five times and naturally dried. Finally, 10 mM  
355 unbuffered Tris base (pH 10.5) was added (100  $\mu$ L per well). Read the optical density at 540 nm  
356 by a microplate reader (SYNERGY H1, BioTek).

### 357 **Establishment of transgenic cell line HEK293T-hACE2**

358 Procedure to establish a cell line expressing human angiotensin-converting enzyme 2 (hACE2)  
359 receptor was previously described (30) and introduced in brief. HEK293T cells were used for  
360 lentiviral vector packaging and transduction. The cells were cultured in DMEM supplemented with  
361 10% FBS (Gibco) and 1 mM nonessential amino acids (Gibco). Sub confluent HEK293T cells in  
362 6-well plates were co-transfected with 0.72  $\mu$ g of pLVX-hACE2-IRES-puro transfer plasmid, 0.64  
363  $\mu$ g of pMD2G-VSVG and 0.64  $\mu$ g of pspAX.2 using transfecting reagent Megatran 1.0 (Origene).

364 Then, 6 h post transfection, the medium was replaced by DMEM supplemented with 3% FBS and  
365 1 mM nonessential amino acids. Next, the lentiviral-containing supernatant was harvested at 48 h  
366 post transfection and filtered by a 0.45  $\mu\text{m}$  filter (Pall). The resultant lentiviruses were used to  
367 integrate hACE2 gene into the genome of HEK293T cells. Procedure of stable lentiviral  
368 transduction was carried out as follows: HEK293T cells were seeded in a 6-well plate and  
369 transduced 24 h later with lentiviral filtrate in presence of 8  $\mu\text{g}/\text{mL}$  polybrene (Macgene). Then,  
370 selection was performed under the pressure of 1  $\mu\text{g}/\text{mL}$  puromycin (Invitrogen) until cells died  
371 completely. Then the cell line was verified by western blot.

### 372 **Generation of SARS-CoV-2 pseudovirus**

373 Construction of a VSV pseudovirus carrying the spike protein of SARS-CoV-2 was formerly  
374 reported (30) and introduced in brief. HEK293T cells were used for pseudovirus packaging.  
375 Subconfluent HEK293T cells in 6-well plates were co-transfected with 1.2  $\mu\text{g}$  of pLenti-FLuc-GFP  
376 transfer plasmid, 0.4  $\mu\text{g}$  of pcDNA 3.1-SARS-CoV-2-Spike plasmid, 0.4  $\mu\text{g}$  of pspAX.2 plasmid  
377 and oligonucleotides (0.3~1.1  $\mu\text{g}$ ) per well. 6 h post transfection, the medium was replaced by  
378 DMEM supplemented with 10% FBS. Next, cell status and green fluorescence was captured by  
379 inverted fluorescence microscope (Olympus) 48 h post transfection, then the pseudovirus-  
380 containing supernatant was harvested and filtered by a 0.45  $\mu\text{m}$  filter (Pall). The resultant  
381 pseudoviruses were further analyzed for viral titer by flow cytometry and luciferase assay.

### 382 **Pseudovirus infection and luciferase assay**

383 In order to determine the titration of pseudovirus, expression of firefly luciferase was conducted as  
384 follows: HEK293T-hACE2 cells were seeded into 96-well black/clear bottom plates (Nunc) at  
385  $5 \times 10^3$  cells per well and cultured for 24 h. Then the medium was replaced by 100  $\mu\text{L}$  pseudovirus  
386 pLenti-FLuc-GFP filtrate and cells were incubated for another 48 h. Expression of firefly luciferase  
387 was quantitated by Bright Glo™ luciferase assay system (Promega) and the plates were read using  
388 a plate reader (Tecan Infinite M2000 PRO).

### 389 **Flow cytometry**

390 The transfection efficiency during pseudovirus packaging was analyzed by flow cytometry. Briefly,  
391 HEK293T cells transfected with plasmid pcDNA pLenti-FLuc-GFP, pcDNA 3.1-SARS-CoV-2-

392 Spike, pspAX.2 and oligonucleotides were incubated for 48 h and GFP expression level was  
393 analyzed by CytoFLEX flow cytometer (Beckman).

394 In order to confirm the titration of pseudovirus, HEK293T-hACE2 cells were seeded into 6-well  
395 plates. After 24 h incubation, the medium was replaced by 1 mL fresh medium mixed with 1 mL  
396 pseudovirus pLenti-FLuc-GFP filtrate. Cells were incubated for 48 h and GFP expression level  
397 was analyzed by CytoFLEX flow cytometer (Beckman).

### 398 **Statistical Analysis**

399 GraphPad Prism 7.04 was used for statistical analysis and graphing. Two-tailed Student's t test was  
400 used to compare data of two experimental groups.

401

402

### 403 **References**

- 404 1. F. Wu, S. Zhao, B. Yu, Y. M. Chen, W. Wang, Z. G. Song, Y. Hu, Z. W. Tao, J. H. Tian,  
405 Y. Y. Pei, M. L. Yuan, Y. L. Zhang, F. H. Dai, Y. Liu, Q. M. Wang, J. J. Zheng, L. Xu, E. C.  
406 Holmes, Y. Z. Zhang, A new coronavirus associated with human respiratory disease in China.  
407 *Nature* **579**, 265-269 (2020).
- 408 2. S. Keam, D. Megawati, S. K. Patel, R. Tiwari, K. Dhama, H. Harapan, Immunopathology  
409 and immunotherapeutic strategies in severe acute respiratory syndrome coronavirus 2 infection.  
410 *Reviews in Medical Virology* **30**, e2123 (2020).
- 411 3. R. K. Guy, R. S. DiPaola, F. Romanelli, R. E. Dutch, Rapid repurposing of drugs for  
412 COVID-19. *Science* **368**, 829 (2020).
- 413 4. Y. Han, G. Whitney, J. Donovan, A. Korennykh, Innate immune messenger 2-5A tethers  
414 human RNase L into active high-order complexes. *Cell Rep.* **2**, 902-913 (2012).
- 415 5. K. Malathi, B. Dong, M. Gale, Jr., R. H. Silverman, Small self-RNA generated by RNase  
416 L amplifies antiviral innate immunity. *Nature* **448**, 816-819 (2007).
- 417 6. P. Luthra, D. Sun, R. H. Silverman, B. He, Activation of IFN- $\beta$  expression by a viral mRNA  
418 through RNase L and MDA5. *Proc. Natl. Acad. Sci. U.S.A.* **108**, 2118-2123 (2011).
- 419 7. P. Manivannan, M. A. Siddiqui, K. Malathi, RNase L amplifies interferon signaling by  
420 inducing protein kinase R-mediated antiviral stress granules. *J. Virol.* **94**, e00205-00220 (2020).
- 421 8. H. J. Ezelle, K. Malathi, B. A. Hassel, The roles of RNase-L in antimicrobial immunity and  
422 the cytoskeleton-associated innate response. *Int. J. Mol. Sci.* **17**, 74 (2016).
- 423 9. J. M. Burke, S. L. Moon, T. Matheny, R. Parker, RNase L reprograms translation by  
424 widespread mRNA turnover escaped by antiviral mRNAs. *Mol. Cell* **75**, 1203-1217 (2019).
- 425 10. H. Yin, Z. Jiang, S. Wang, P. Zhang, IFN-gamma restores the impaired function of RNase  
426 L and induces mitochondria-mediated apoptosis in lung cancer. *Cell Death Dis.* **10**, 642 (2019).
- 427 11. S. Rath, E. Prangley, J. Donovan, K. Demarest, N. S. Wingreen, Y. Meir, A. Korennykh,  
428 Concerted 2-5A-mediated mRNA decay and transcription reprogram protein synthesis in the  
429 dsRNA response. *Mol. Cell* **75**, 1218-1228 (2019).



- 430 12. X. L. Li, J. A. Blackford, B. A. Hassel, RNase L mediates the antiviral effect of interferon  
431 through a selective reduction in viral RNA during encephalomyocarditis virus infection. *J. Virol.*  
432 **72**, 2752-2759 (1998).
- 433 13. M. G. Costales, Y. Matsumoto, S. P. Velagapudi, M. D. Disney, Small molecule targeted  
434 recruitment of a nuclease to RNA. *J. Am. Chem. Soc.* **140**, 6741-6744 (2018).
- 435 14. H. S. Haniff, Y. Tong, X. Liu, J. L. Chen, B. M. Suresh, R. J. Andrews, J. M. Peterson, C.  
436 A. O'Leary, R. I. Benhamou, W. N. Moss, M. D. Disney, Targeting the SARS-CoV-2 RNA  
437 genome with small molecule binders and ribonuclease targeting chimera (RIBOTAC) degraders.  
438 *ACS Cent. Sci.* **6**, 1713-1721 (2020).
- 439 15. B. Berber, C. Aydin, F. Kocabas, G. Guney-Esken, K. Yilancioglu, M. Karadag-Alpaslan,  
440 M. Caliseki, M. Yuce, S. Demir, C. Tastan, Gene editing and RNAi approaches for COVID-19  
441 diagnostics and therapeutics. *Gene Ther.*, (2020).
- 442 16. T. C. Roberts, R. Langer, M. J. A. Wood, Advances in oligonucleotide drug delivery. *Nat.*  
443 *Rev. Drug Discovery* **19**, 673-694 (2020).
- 444 17. S. Kondo, Y. Kondo, G. Li, R. H. Silverman, J. K. Cowell, Targeted therapy of human  
445 malignant glioma in a mouse model by 2-5A antisense directed against telomerase RNA. *Oncogene*  
446 **16**, 3323-3330 (1998).
- 447 18. N. M. Cirino, G. Li, W. Xiao, P. F. Torrence, R. H. Silverman, Targeting RNA decay with  
448 2',5' oligoadenylate-antisense in respiratory syncytial virus-infected cells. *Proc. Natl. Acad. Sci. U.*  
449 *S. A.* **94**, 1937-1942 (1997).
- 450 19. F. Kopp, J. T. Mendell, Functional Classification and Experimental Dissection of Long  
451 Noncoding RNAs. *Cell* **172**, 393-407 (2018).
- 452 20. S. E. Galloway, P. Paul, D. R. MacCannell, M. A. Johansson, J. T. Brooks, A. MacNeil, R.  
453 B. Slayton, S. Tong, B. J. Silk, G. L. Armstrong, M. Biggerstaff, V. G. Dugan, Emergence of  
454 SARS-CoV-2 B.1.1.7 Lineage — United States, December 29, 2020–January 12, 2021. *Morb.*  
455 *Mortal. Wkly. Rep.* **70**, 95-99 (2021).
- 456 21. S. Zhao, J. Lou, L. Cao, H. Zheng, M. K. C. Chong, Z. Chen, R. W. Y. Chan, B. C. Y. Zee,  
457 P. K. S. Chan, M. H. Wang, Quantifying the transmission advantage associated with N501Y  
458 substitution of SARS-CoV-2 in the UK: an early data-driven analysis. *J. Travel Med.*, (2021).
- 459 22. J. K. Lam, W. Liang, H. K. Chan, Pulmonary delivery of therapeutic siRNA. *Adv. Drug*  
460 *Del. Rev.* **64**, 1-15 (2012).
- 461 23. W. Liang, A. Y. L. Chan, M. Y. T. Chow, F. F. K. Lo, Y. Qiu, P. C. L. Kwok, J. K. W.  
462 Lam, Spray freeze drying of small nucleic acids as inhaled powder for pulmonary delivery. *Asian*  
463 *J. Pharm. Sci.* **13**, 163-172 (2018).
- 464 24. C. Liu, Q. Zhou, Y. Li, L. V. Garner, S. P. Watkins, L. J. Carter, J. Smoot, A. C. Gregg, A.  
465 D. Daniels, S. Jervy, D. Albaiu, Research and development on therapeutic agents and vaccines  
466 for COVID-19 and related human coronavirus diseases. *ACS Cent. Sci.* **6**, 315-331 (2020).
- 467 25. R. Channappanavar, Anthony R. Fehr, R. Vijay, M. Mack, J. Zhao, David K. Meyerholz,  
468 S. Perlman, Dysregulated type I Interferon and inflammatory monocyte-macrophage responses  
469 cause lethal pneumonia in SARS-CoV-infected mice. *Cell Host Microbe* **19**, 181-193 (2016).
- 470 26. D. Acharya, G. Liu, M. U. Gack, Dysregulation of type I interferon responses in COVID-  
471 19. *Nat. Rev. Immunol.* **20**, 397-398 (2020).
- 472 27. B. Dong, R. H. Silverman, A bipartite model of 2-5A-dependent RNase L. *J. Biol. Chem.*  
473 **272**, 22236-22242 (1997).
- 474 28. B. Zhang, Y. Wang, S. Huang, J. Sun, M. Wang, W. Ma, Y. You, L. Wu, J. Hu, W. Song,  
475 X. Liu, S. Li, H. Chen, G. Zhang, L. Zhang, D. Zhou, L. Li, X. Zhang, Photoswitchable CAR-T  
476 cell function in vitro and in vivo via a cleavable mediator. *Cell Chemical Biology* **28**, 60-69 (2021).

477 29. L. Si, H. Xu, X. Zhou, Z. Zhang, Z. Tian, Y. Wang, Y. Wu, B. Zhang, Z. Niu, C. Zhang, G.  
478 Fu, S. Xiao, Q. Xia, L. Zhang, D. Zhou, Generation of influenza A viruses as live but replication-  
479 incompetent virus vaccines. *Science* **354**, 1170-1173 (2016).

480 30. H. L. Xiong, Y. T. Wu, J. L. Cao, R. Yang, Y. X. Liu, J. Ma, X. Y. Qiao, X. Y. Yao, B. H.  
481 Zhang, Y. L. Zhang, W. H. Hou, Y. Shi, J. J. Xu, L. Zhang, S. J. Wang, B. R. Fu, T. Yang, S. X.  
482 Ge, J. Zhang, Q. Yuan, B. Y. Huang, Z. Y. Li, T. Y. Zhang, N. S. Xia, Robust neutralization assay  
483 based on SARS-CoV-2 S-protein-bearing vesicular stomatitis virus (VSV) pseudovirus and ACE2-  
484 overexpressing BHK21 cells. *Emerging Microbes Infect.* **9**, 2105-2113 (2020).

485

## 486 **Acknowledgements**

487

488 **Funding:** This work was supported by National Natural Science Foundation of China (Grants No.  
489 81821004, 21877001, 22077005, and National Major Scientific and Technological Special Project  
490 for “Significant New Drugs Development” (Grant No. 2017ZX09303013) **Author contributions:**

491 X.T. and X.S. conceived this study and designed experiments. X.S. and Q.W. prepared the protein.

492 B.C. and Z.G. constructed pseudovirus mutants. W.M. and B.C. performed experiments related to

493 pseudovirus. X.S. performed most of the experiments and analyzed data except those noted. X.S

494 wrote the manuscript. X.T., Q.W., W.M. and D.Z. revised the manuscript. **Competing interests:**

495 A patent application was filed. **Data and materials availability:** Genome sequences and protein

496 sequence have been deposited in GenBank with accession number NC\_045512.2, NM\_021133.4

497 and NP\_066956.1. All data needed to evaluate the conclusions in the paper are present in the paper

498 and/or the Supplementary Materials. Additional data related to this paper are available from the

499 corresponding author.

500

501 **Figures and Tables**

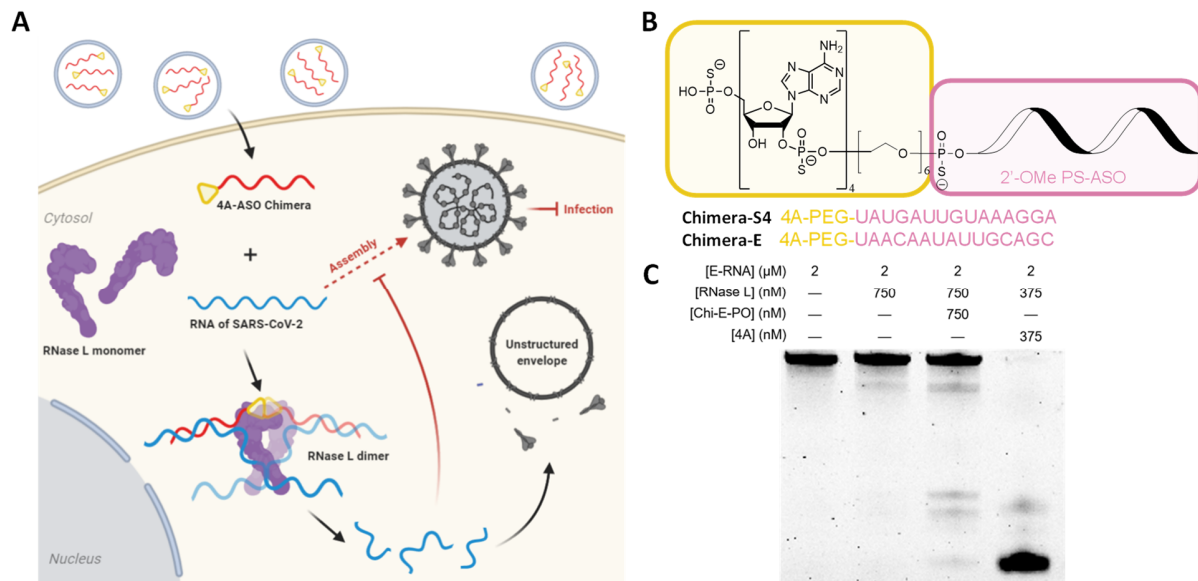

502  
 503 **Fig 1. Rational design of 4A<sub>2-5</sub>-ASO chimeric antisense oligonucleotides to target and degrade**  
 504 **SARS-CoV-2 RNA by RNase L recruitment. (A)** Schematic representation of 4A<sub>2-5</sub>-ASO  
 505 chimera induced inhibition of SARS-CoV-2 proliferation. Black arrows, the actual processing of  
 506 viral RNA upon treatment; dashed arrow, inhibited viral assembly during SARS-CoV-2 infection.  
 507 **(B)** Structures of 4A<sub>2-5</sub>-ASO Chimeras targeting envelope- (E-) and spike- (S-) RNA of SARS-  
 508 CoV-2, respectively. **(C)** *In vitro* cleavage assay of a 3' Cy3-labeled E-RNA segment (62 nt).

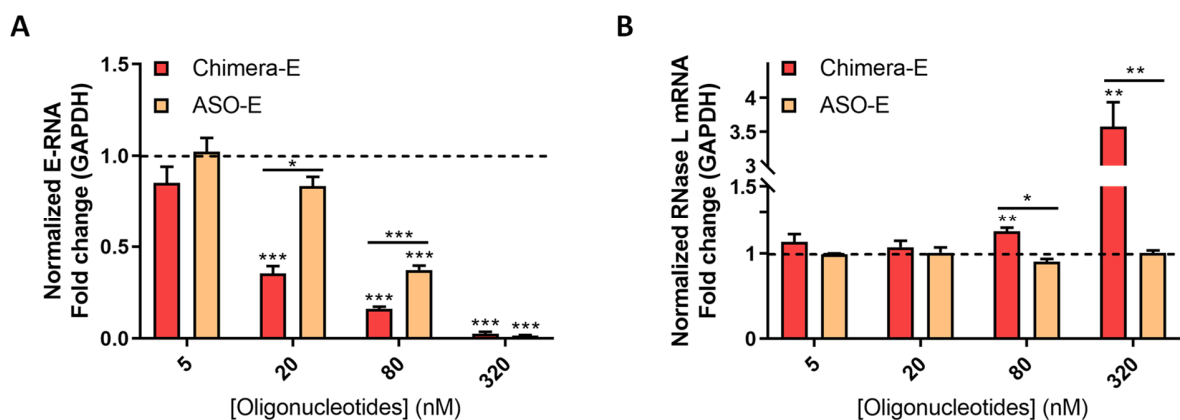

509  
 510 **Fig 2. Targeted degradation of SARS-CoV-2 envelope RNA (E-RNA) with RNase L**  
 511 **participation in Vero cells. Effective degradation of E-RNA (A) and up-regulation of RNase L**  
 512 **(B) with the chimeric sequence targeting E-RNA of SARS-CoV-2 (Chimera-E) in comparison to**  
 513 **pure antisense oligonucleotide (ASO-E) in Vero cells co-transfected with pCAG-nCoV-E-FLAG**

514 plasmids (250 ng/well), as measured by RT-qPCR. Data represent mean  $\pm$  s.e.m. ( $n \geq 3$ ). \* $P <$   
 515 0.033, \*\* $P <$  0.002, \*\*\* $P <$  0.001 as measured by a two-tailed Student's t test.

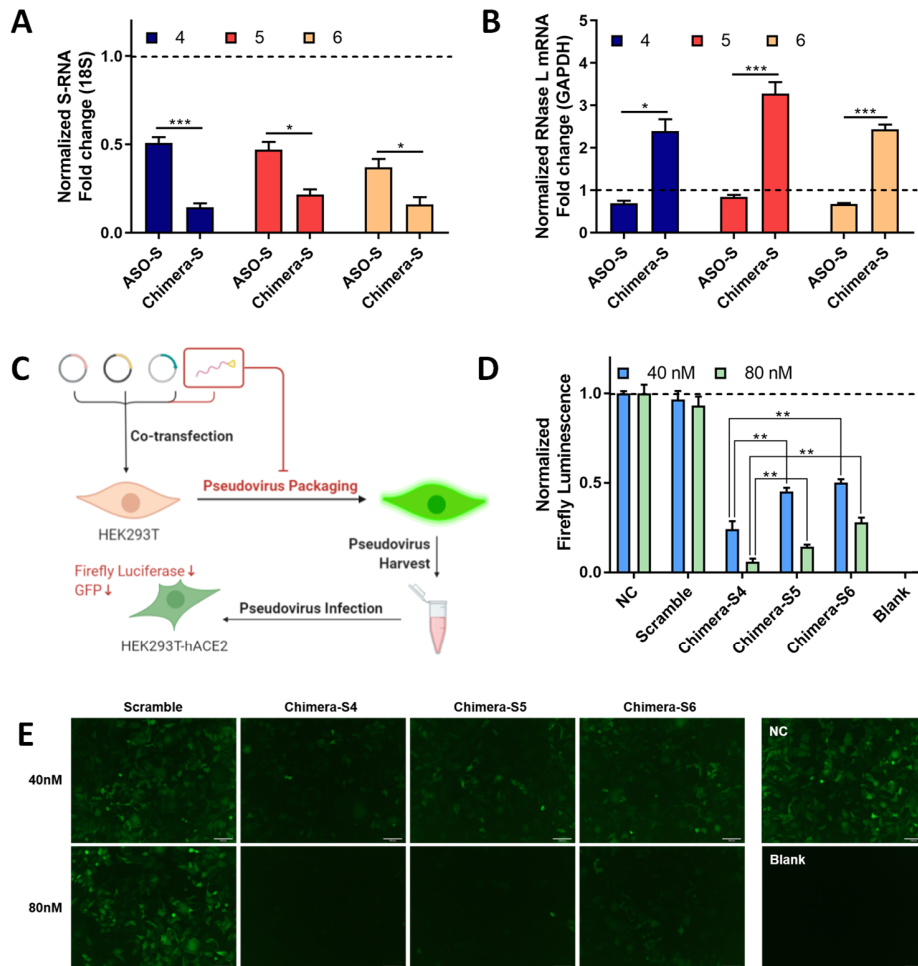

516

517 **Fig 3. Screening the most effective 4A<sub>2.5</sub>-ASO chimeric oligonucleotides to target spike RNA**  
 518 **(S-RNA) of SARS-CoV-2.** Transcription levels of S-RNA (A) and RNase L mRNA (B) in 24h  
 519 after co-transfection of pCAG-nCoV-S-FLAG plasmid and Chimera-S4, Chimera-S5, Chimera-S6  
 520 or their corresponding antisense oligonucleotides (ASO-S4, ASO-S5, ASO-S6) respectively, as  
 521 measured by RT-qPCR. (C) Experimental procedure to evaluate the inhibitory effect of 4A<sub>2.5</sub>-ASO  
 522 chimeras on virus packaging and infection in a pseudotyped SARS-CoV-2 infection model.  
 523 Relative expression levels of firefly luciferase (D) and GFP (E) in infected HEK293T-hACE2 cells  
 524 after Chimera-S4, Chimera-S5, or Chimera-S6 treatment (40 nM and 80 nM), respectively.  
 525 Negative control (NC), group transfected with only virus-constructing plasmids. Scramble, group  
 526 treated with the plasmids and a nonsense oligonucleotide Blank, group without exogenous

527 transfection. Scale bar = 100  $\mu$ m. Data represent mean  $\pm$  s.e.m. ( $n \geq 3$ ). \* $P < 0.033$ , \*\* $P < 0.002$ ,  
 528 \*\*\* $P < 0.001$  as measured by a two-tailed Student's t test.

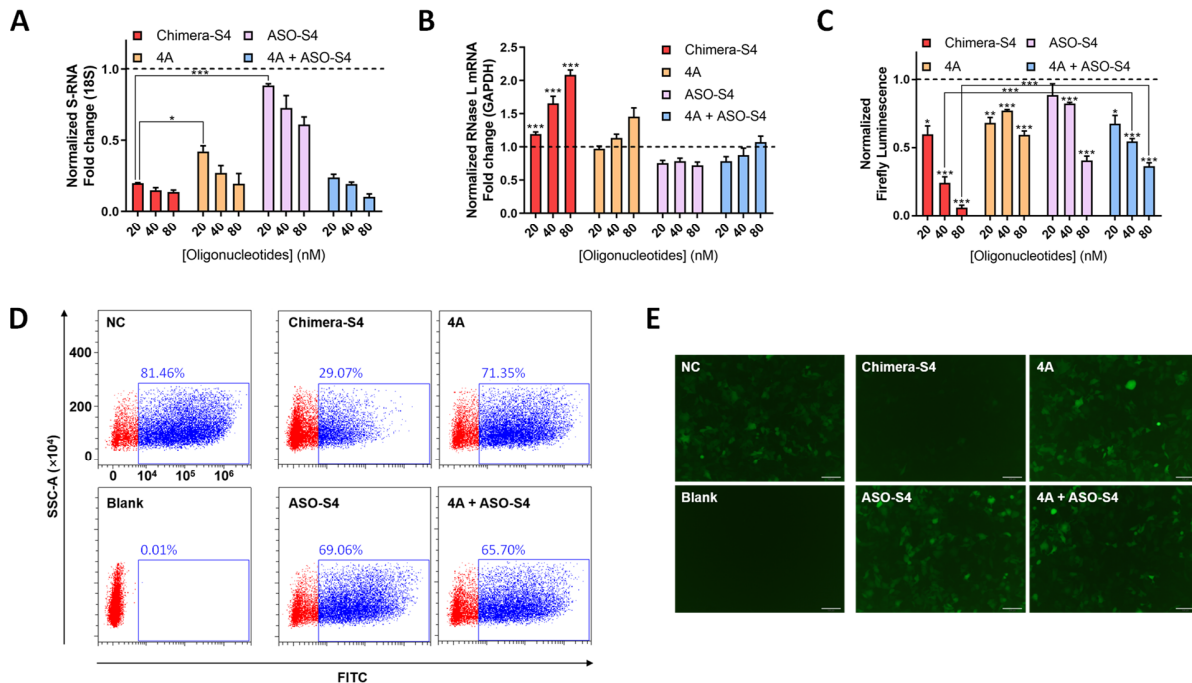

529

530 **Fig 4. Chimeric-S4 can effectively degrade S-RNA of SARS-CoV-2 in Vero cells and inhibit**  
 531 **pseudoviral infection of SARS-CoV-2 *in vitro*.** (A, B) Concentration-dependent degradation of  
 532 S-RNA and increase of RNase L mRNA in Vero cells after 24 h treatment with Chimera-S4. Firefly  
 533 luminescence (C, 20 ~ 80 nM oligonucleotides), cytometry analysis of GFP signals (D, 40 nM  
 534 oligonucleotides), GFP fluorescence images (E, 40 nM oligonucleotides) in HEK293T-hACE2  
 535 cells after 48 h infection of the collected SARS-CoV-2 pseudovirus under different treatments.  
 536 Negative control (NC), transfection of virus-constructing plasmids. Blank, without exogenous  
 537 transfection. 4A<sub>2-5</sub> + ASO-S4, co-transfection of virus-constructing plasmids and physically mixed  
 538 4A<sub>2-5</sub> and ASO-S4 with each final concentration of 20 nM, 40 nM and 80 nM. Scale bar = 100  $\mu$ m.  
 539 Data represent mean  $\pm$  s.e.m. ( $n \geq 3$ ). \* $P < 0.033$ , \*\* $P < 0.002$ , \*\*\* $P < 0.001$  as measured by a  
 540 two-tailed Student's t test.

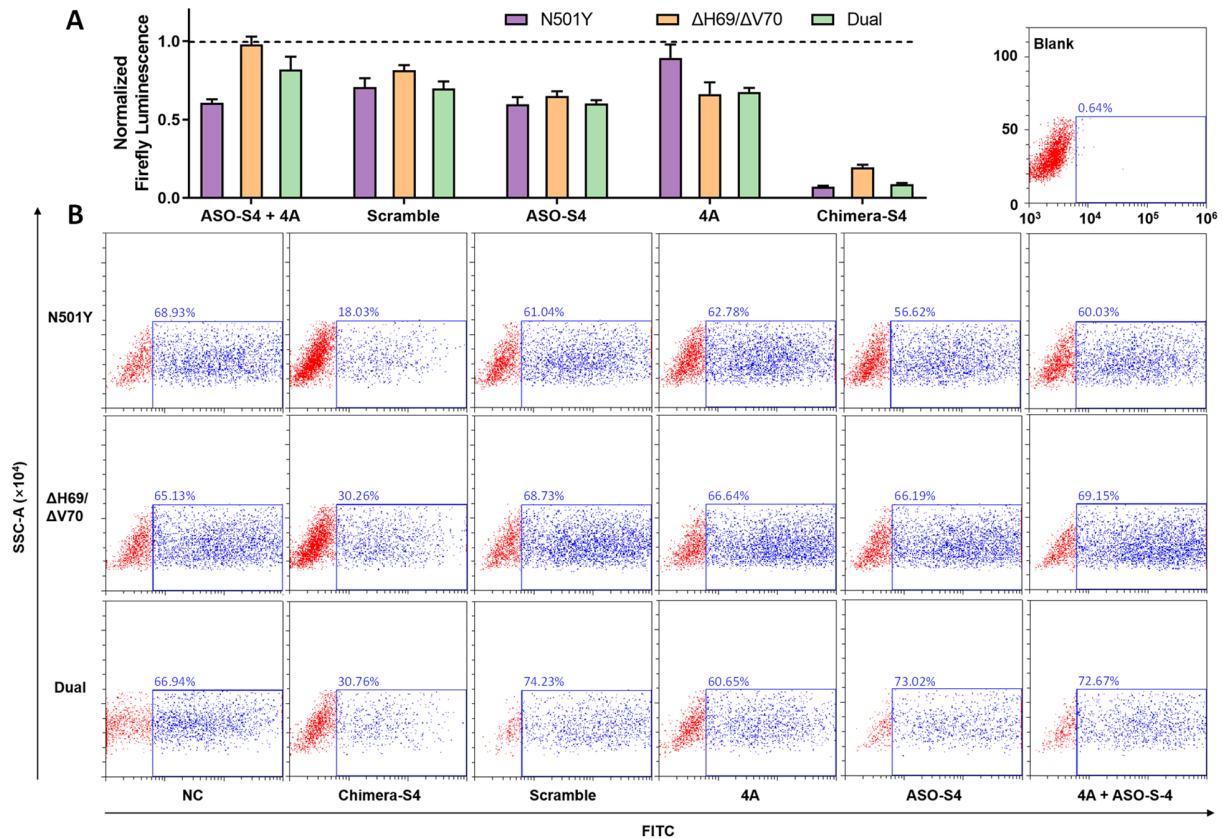

541

542 **Fig 5. Investigate the viral titer of SARS-CoV-2 mutants upon Chimera-S4 treatment.**

543 Efficient inhibited infection of three mutated SARS-CoV-2 pseudoviruses, N501Y,  $\Delta$ H69/ $\Delta$ V70

544 and their combined mutants (Dual) in HEK293T-hACE2 cells after Chimera-S4 treatment (40 nM,

545 48 h), as measured by luciferase assay (A) and GFP signal analysis (B).
